# Supplementary material for: ‘MATRI-SUMAN’ a capacity building and text messaging intervention to enhance maternal and child health service utilization among pregnant women from rural Nepal: study protocol for a cluster randomised controlled trial
Source: Springer Nature journal article supplement (doi:10.1186/s12913-018-3223-6), 2018-06-13
Supplement: MOESM2 [file 15846002]

**Formats: Female Community Health Volunteers (FCHV) monitoring formats**

**Format-1: FCHV Monitoring Format (During Pregnancy)**

|                                                                                                                                 |                                                                                                        |                                                                                                |                                                                                             |
|---------------------------------------------------------------------------------------------------------------------------------|--------------------------------------------------------------------------------------------------------|------------------------------------------------------------------------------------------------|---------------------------------------------------------------------------------------------|
|  <p><b>Suggestions for Pregnant Women</b></p> | <p><b>Number of Pregnant women Identified =.....</b></p>                                               |              | <p><b>Number of Pregnancy Registered=.....</b></p>                                          |
|                                                                                                                                 | <p><b>No. of Pregnant Women who got suggestions from FCHV</b></p>                                      | <p><b>Suggestions</b></p>                                                                      | <p><b>No. of Pregnant Women who following the Suggestions of FCHV</b></p>                   |
|                                                                                                                                 | <p>Suggestion For: 4 ANC <input type="radio"/></p>                                                     |              | <p>No. of Pregnant Women receiving ANC <input type="checkbox"/></p>                         |
|                                                                                                                                 | <p>Suggestion For: IFA <input type="radio"/></p>                                                       |              | <p>No. of Pregnant Women taking IFA Tablets <input type="checkbox"/></p>                    |
|                                                                                                                                 | <p>Suggestion For: TD <input type="radio"/></p>                                                        |              | <p>No. of Pregnant Women taken TD <input type="checkbox"/></p>                              |
|                                                                                                                                 | <p>Suggestion For: De-worm <input type="radio"/></p>                                                   |             | <p>No. of Pregnant Women taken De-worming tablets <input type="checkbox"/></p>              |
|                                                                                                                                 | <p>Suggestion For: Additional &amp; nutritious diet <input type="radio"/></p>                          |            | <p>No. of Pregnant Women taking additional and nutritious diet <input type="checkbox"/></p> |
|                                                                                                                                 | <p>Suggestion For: No Alcohol &amp; Smoking (Among Alcoholism &amp; Smokers) <input type="radio"/></p> |            | <p>No. of Pregnant Women who quit Alcohol &amp; Smoking <input type="checkbox"/></p>        |
|                                                                                                                                 | <p>Suggestion For: Rest &amp; Sleep after Lunch <input type="radio"/></p>                              |            | <p>No. of pregnant Women taking Rest and Sleep after Lunch <input type="checkbox"/></p>     |
|                                                                                                                                 | <p>Suggestion For: Personal Hygiene. <input type="radio"/></p>                                         |            | <p>No. of pregnant Women practicing personal hygiene <input type="checkbox"/></p>           |
| <p>Suggestion For: Safe Delivery <input type="radio"/></p>                                                                      |                    | <p>No. of pregnant Women having Safe Delivery <input type="checkbox"/></p>                     |                                                                                             |
| <p>Suggestion For: Prepared with Money &amp; Transportation <input type="radio"/></p>                                           |                    | <p>No. of pregnant Women Prepared with Money &amp; Transportation <input type="checkbox"/></p> |                                                                                             |

## Format-2:FCHV Monitoring Format (During Post-natal period)

|                                                                                                                                                   | <i>No. of Post-natal Women who got suggestions from FCHV</i>                            |    | <i>No. of Post-natal Women who following the Suggestions of FCHV</i>                            |
|---------------------------------------------------------------------------------------------------------------------------------------------------|-----------------------------------------------------------------------------------------|--------------------------------------------------------------------------------------|-------------------------------------------------------------------------------------------------|
| <br><b>Suggestion for Postnatal Mother &amp; Newborn babies</b> | <b><i>Suggestions for New Born Babies:</i></b>                                          |                                                                                      |                                                                                                 |
|                                                                                                                                                   | Suggestion:<br>To Clean with dry /soft cloths & to Keep baby warm <input type="radio"/> |    | No. of Newborn cleaned with Soft & Dry cloths and kept warm. <input type="checkbox"/>           |
|                                                                                                                                                   | Suggestion:<br>To Put the baby to the mother chest. <input type="radio"/>               |    | No. of Newborn put to their mothers Chest. <input type="checkbox"/>                             |
|                                                                                                                                                   | Suggestion:<br>Not to bath the baby for 24 hour <input type="radio"/>                   |    | No. of Newborn having no bath within 24 hour of birth. <input type="checkbox"/>                 |
|                                                                                                                                                   | Suggestion: Not to apply anything other to the chord of baby <input type="radio"/>      |    | No. of Newborn with no application of anything ot to their chord. <input type="checkbox"/>      |
|                                                                                                                                                   | Suggestion: To Initiate breast milk within one hour & to fe <input type="radio"/>       |   | No. of Newborn initiated breast milk within one hour & fed colostrums. <input type="checkbox"/> |
|                                                                                                                                                   | <b><i>Suggestions for Post Natal Mothers:</i></b>                                       |                                                                                      |                                                                                                 |
|                                                                                                                                                   | Suggestion For: 3 PNC (Mother & Newborn) <input type="radio"/>                          |  | No. of Mothers & babies visited 3 PNC <input type="checkbox"/>                                  |
|                                                                                                                                                   | Suggestion For: IFA tablet <input type="radio"/>                                        |  | No. of Mothers took IFA Tablets. <input type="checkbox"/>                                       |
|                                                                                                                                                   | Suggestion For: Vitamin A capsule <input type="radio"/>                                 |  | No. of Mothers took Vitamin A capsule. <input type="checkbox"/>                                 |
|                                                                                                                                                   | Suggestion For: Additional & Nutritious Food <input type="radio"/>                      |  | No. of Mothers took Additional & Nutritious Food <input type="checkbox"/>                       |
|                                                                                                                                                   | Suggestion For: Exclusive Breastfeeding <input type="radio"/>                           |  | No. of Mothers practicing Exclusive Breastfeeding. <input type="checkbox"/>                     |
|                                                                                                                                                   | Suggestion For: Complementary Feeding <input type="radio"/>                             |  | No. of Mothers who has given Complementary feeding in time <input type="checkbox"/>             |
| Suggestion For: Immunization <input type="radio"/>                                                                                                |     | No. of Mothers who immunized their child. <input type="checkbox"/>                   |                                                                                                 |
| Suggestion For: Growth Monitoring <input type="radio"/>                                                                                           |     | No. of Mothers who monitored growth for their baby. <input type="checkbox"/>         |                                                                                                 |
